# Supplementary material
Source: PubMed Central journal article supplement (PMC7995319)
Supplement: sj-pdf-1-eso-10.1177_23969873211000258.pdf [file sj-pdf-1-eso-10.1177_23969873211000258.pdf]

## Supplementary material

**Supplementary Table 1.** Factors frequently associated with PS-CI and dementia (1, 2).

| <b>Factors</b>      |                                                                                 |
|---------------------|---------------------------------------------------------------------------------|
| <b>Risk profile</b> | Age (> 70 or 75 years)                                                          |
|                     | Female sex                                                                      |
|                     | Education level (primary vs. other)                                             |
|                     | Diabetes                                                                        |
|                     | Alcohol abuse                                                                   |
|                     | Previous episode of stroke                                                      |
|                     | Pre-stroke cognitive impairment                                                 |
| <b>Acute phase</b>  | Severity of neurological deficit                                                |
|                     | Aphasia, delirium, abnormal cognitive screening test                            |
|                     | Acute complication (urinary incontinence, hypoxia, early seizure, for instance) |
| <b>Imaging</b>      | Multiple or previous infarct/haemorrhage                                        |
|                     | Left hemispheric infarct/haemorrhage                                            |
|                     | Strategic infarct/haemorrhage                                                   |
|                     | Extensive white matter abnormalities                                            |
|                     | Microbleeds                                                                     |
|                     | Hippocampal atrophy                                                             |

**Supplementary Table 2.** Illustration of an Harmonization Standards cognitive battery (3). Similar cognitive profiles were found across countries (4,5, 6,7).

| <b>Domain</b>                                  | <b>Tests</b>                                                                                                                                                       |
|------------------------------------------------|--------------------------------------------------------------------------------------------------------------------------------------------------------------------|
| <b>Screening tests</b>                         | Prestroke CI: Informant Questionnaire for Cognitive Decline in the Elderly (short)<br>Poststroke CI Mini-Mental State Examination or Montreal Cognitive Assessment |
| <b>Language</b>                                | Shortened Naming test (such as Boston Naming test)<br>± oral comprehension test (shortened Token test)<br>± aphasia battery                                        |
| <b>Visuospatial and constructive abilities</b> | Rey–Osterrieth complex figure test (copy)<br>± Albert cancellation test                                                                                            |
| <b>Memory</b>                                  | California or Hopkins verbal learning test<br>Or Free Cued Selective Reminding test<br>Rey–Osterrieth complex figure test (delayed reproduction ) or Doors test    |
| <b>Executive functions</b>                     | Verbal fluency: categorical and literal<br>Trail Making Test B<br>Behavioral Inventory validated for dysexecutive disorder                                         |
| <b>Action speed</b>                            | Trail Making Test A<br>Digit Symbol substitution test                                                                                                              |
| <b>Neuropsychiatric symptoms</b>               | Depression Scale such as Center for Epidemiological Study                                                                                                          |

**Supplementary Table 3.** Complementary investigations for major CI-CVD subtypes (8-14)

| CI-CVD subtype                         | Aim of investigation                                                                                                                             | Suggested investigations                                                                                             |
|----------------------------------------|--------------------------------------------------------------------------------------------------------------------------------------------------|----------------------------------------------------------------------------------------------------------------------|
| PSD (including multi-infarct dementia) | Stroke subtype identification; Identification of treatable/preventable underlying mechanism; extension and localization of vascular brain injury | As per TOAST (15) /ASCOD (16) classification criteria<br>MRI (CT)                                                    |
| SVD                                    | Sporadic or genetic? (CADASIL, CAA etc)                                                                                                          | MRI prerequisite<br>Genetic testing if clinical and neuroradiological phenotype imply (17)                           |
| Mixed vascular-degenerative dementia   | Confirmation of mixed pathology                                                                                                                  | MRI (CT)<br>CSF analysis (reduced amyloid $\beta_{1-42}$ and increased phosphorylated-tau181 in Alzheimer pathology) |

CI – cognitive impairment; CVD – cerebrovascular disease; CADASIL – Cerebral Autosomal Dominant Arteriopathy with Subcortical Infarcts and Leukoencephalopathy; CAA – cerebral amyloid angiopathy; CSF – cerebrospinal fluid; TOAST – Trial of Org 10172 in Acute Stroke Treatment; ASCOD – A: atherosclerosis, S: small-vessel disease, C: cardiac pathology, O: other causes, D: dissection; MRI – Magnetic resonance imaging; CT – computerized tomography

## References:

1. Godefroy O, Yaiche H, Taillia H, et al for the GRECogVASC study group. Who should undergo a comprehensive cognitive assessment after a stroke? A cognitive risk score. *Neurology* 2018; 91: e1979-87.
2. Pendlebury ST, Rothwell PM. Prevalence, incidence, and factors associated with pre-stroke and post-stroke dementia: a systematic review and meta-analysis. *Lancet Neurol* 2009; 8: 1006-18.
3. Hachinski V, Iadecola C, Petersen RC, et al. National Institute of Neurological Disorders and Stroke-Canadian Stroke Network Vascular Cognitive Impairment Harmonization Standards. *Stroke* 2006; 37: 2220-224.
4. Sachdev PS, Lo JW, Crawford JD, et al. STROKOG Consortium. An international consortium to examine the epidemiology, diagnosis, and treatment of neurocognitive disorders in relation to cerebrovascular disease. *Alzheimers Dement* 2016; 7: 11-23.
5. Lo JW, Crawford JD, Desmond DW, et al. Stroke and Cognition (STROKOG) Collaboration. Profile of and risk factors for post stroke cognitive impairment in diverse ethnoregional groups. *Neurology* 2019; 93: e2257-e2271
6. Yu KH, Cho SJ, Oh MS, Jung S, Lee JH, Shin JH, Koh IS, Cha JK, Park JM, Bae HJ, Kang Y, Lee BC; Korean-Vascular Cognitive Impairment Harmonization Standards Study Group. Cognitive impairment evaluated with Vascular Cognitive Impairment Harmonization Standards in a multicenter prospective stroke cohort in Korea. *Stroke*. 2013 Mar;44(3):786-8.
7. Pendlebury ST, Mariz J, Bull L, Mehta Z, Rothwell PM. MoCA, ACE-R, and MMSE versus the National Institute of Neurological Disorders and Stroke-Canadian Stroke Network Vascular Cognitive Impairment Harmonization Standards Neuropsychological Battery after TIA and stroke. *Stroke*. 2012 Feb;43(2):464-9.
8. Biessels GJ. Diagnosis and treatment of vascular damage in dementia. *Biochim Biophys Acta* 2016; 1862: 869-77.
9. Amarenco P, Bogousslavsky J, Caplan LR, et al. The ASCOD phenotyping of ischemic stroke (Updated ASCO Phenotyping). *Cerebrovasc Dis* 2013; 36: 1-5.
10. Sirimarco G, Lavallée PC, Labreuche J, et al. Overlap of diseases underlying ischemic stroke: the ASCOD phenotyping. *Stroke*. 2013; 44: 2427-33.
11. Amarenco P, Bogousslavsky J, Caplan LR, et al. New approach to stroke subtyping: the A-S-C-O (phenotypic) classification of stroke. *Cerebrovasc Dis* 2009; 27: 502-8.
12. Rosenberg GA, Wallin A, Wardlaw JM, et al. Consensus statement for diagnosis of subcortical small vessel disease. *J Cereb Blood Flow Metab* 2016; 36: 6-25.
13. Wallin A, Kapaki E, Boban M, et al. Biochemical markers in vascular cognitive impairment associated with subcortical small vessel disease - A consensus report. *BMC Neurol* 2017; 17: 102.
14. Skrobot OA, O'Brien J, Black S, et al; VICCS group, Ben-Shlomo Y, Passmore AP, Love S, Kehoe PG. The Vascular Impairment of Cognition Classification Consensus Study. *Alzheimers Dement* 2017;13:624-633
15. Adams HP, Bendixen BH, Kappelle LJ, et al. Classification of subtype of acute ischemic stroke: definitions for use in a multicenter clinical trial. *Stroke*. 1993; 24: 35-41
16. Amarenco P, Bogousslavsky J, Caplan LR et al. The ASCOD phenotyping of ischemic stroke (Updated ASCO Phenotyping). *Cerebrovasc Dis* 2013; 36: 1-5.

17. Ikram MA, Bersano A, Manso-Calderón R, Jia JP, Schmidt H, Middleton L, Nacmias B, Siddiqi S, Adams HH. Genetics of vascular dementia - review from the ICVD working group. *BMC Med* 2017; 15: 48.
